# Supplementary material
Source: ML conference proceedings conference paper supplement (https://openreview.net/forum?id=BYoU2hB29F)

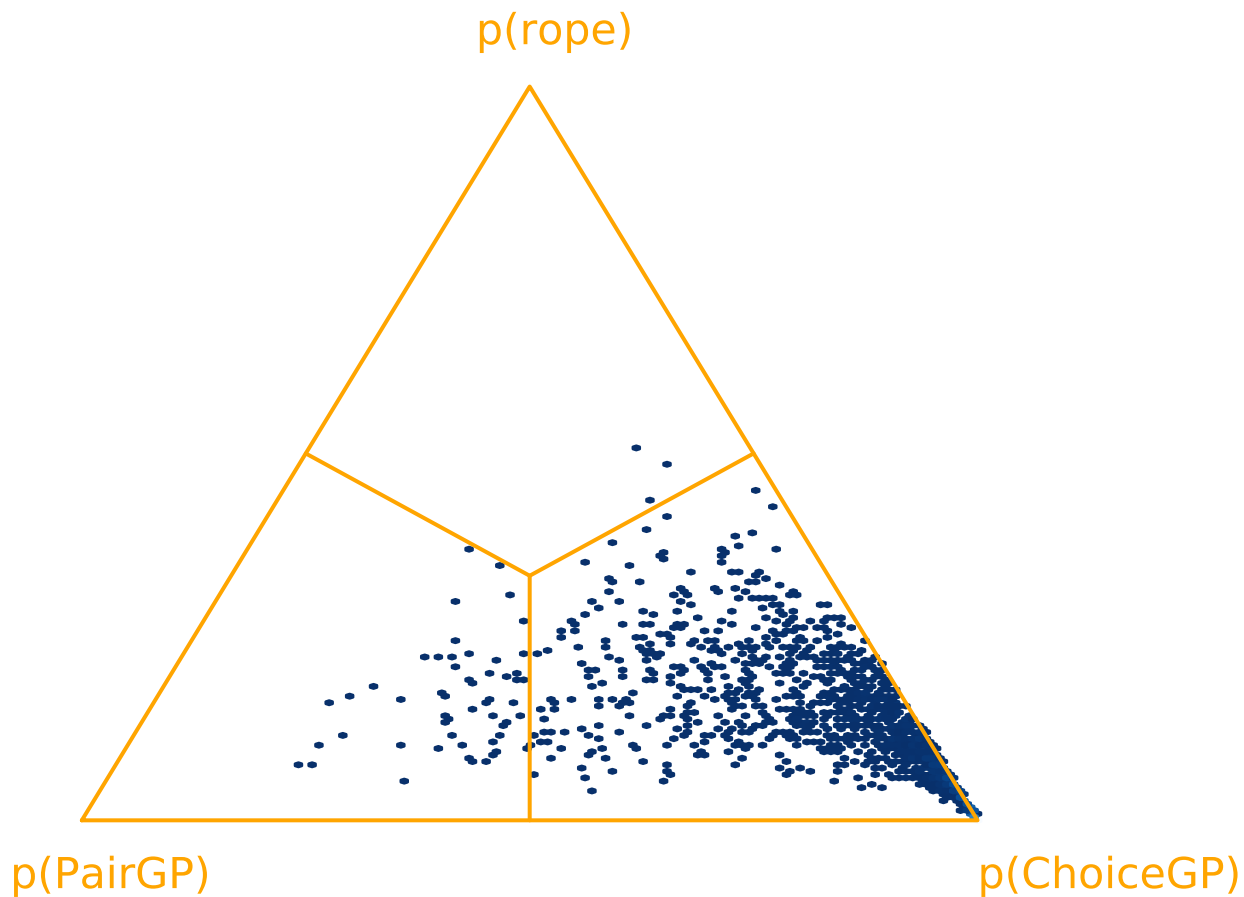

Supplement: supplementary_material [file attachment]

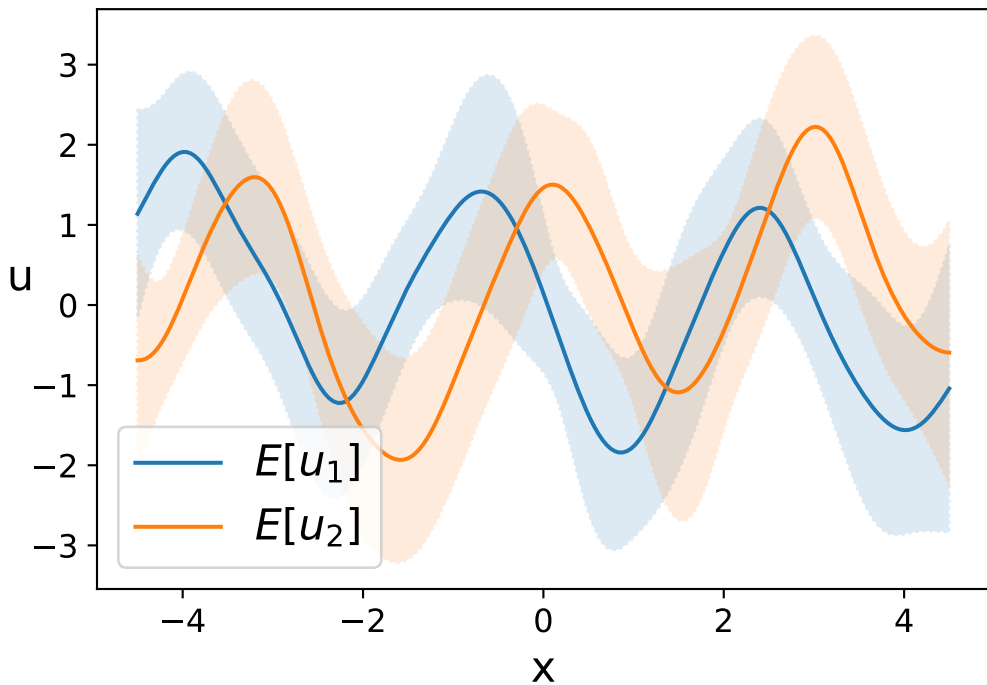

Supplement: supplementary_material [file attachment]

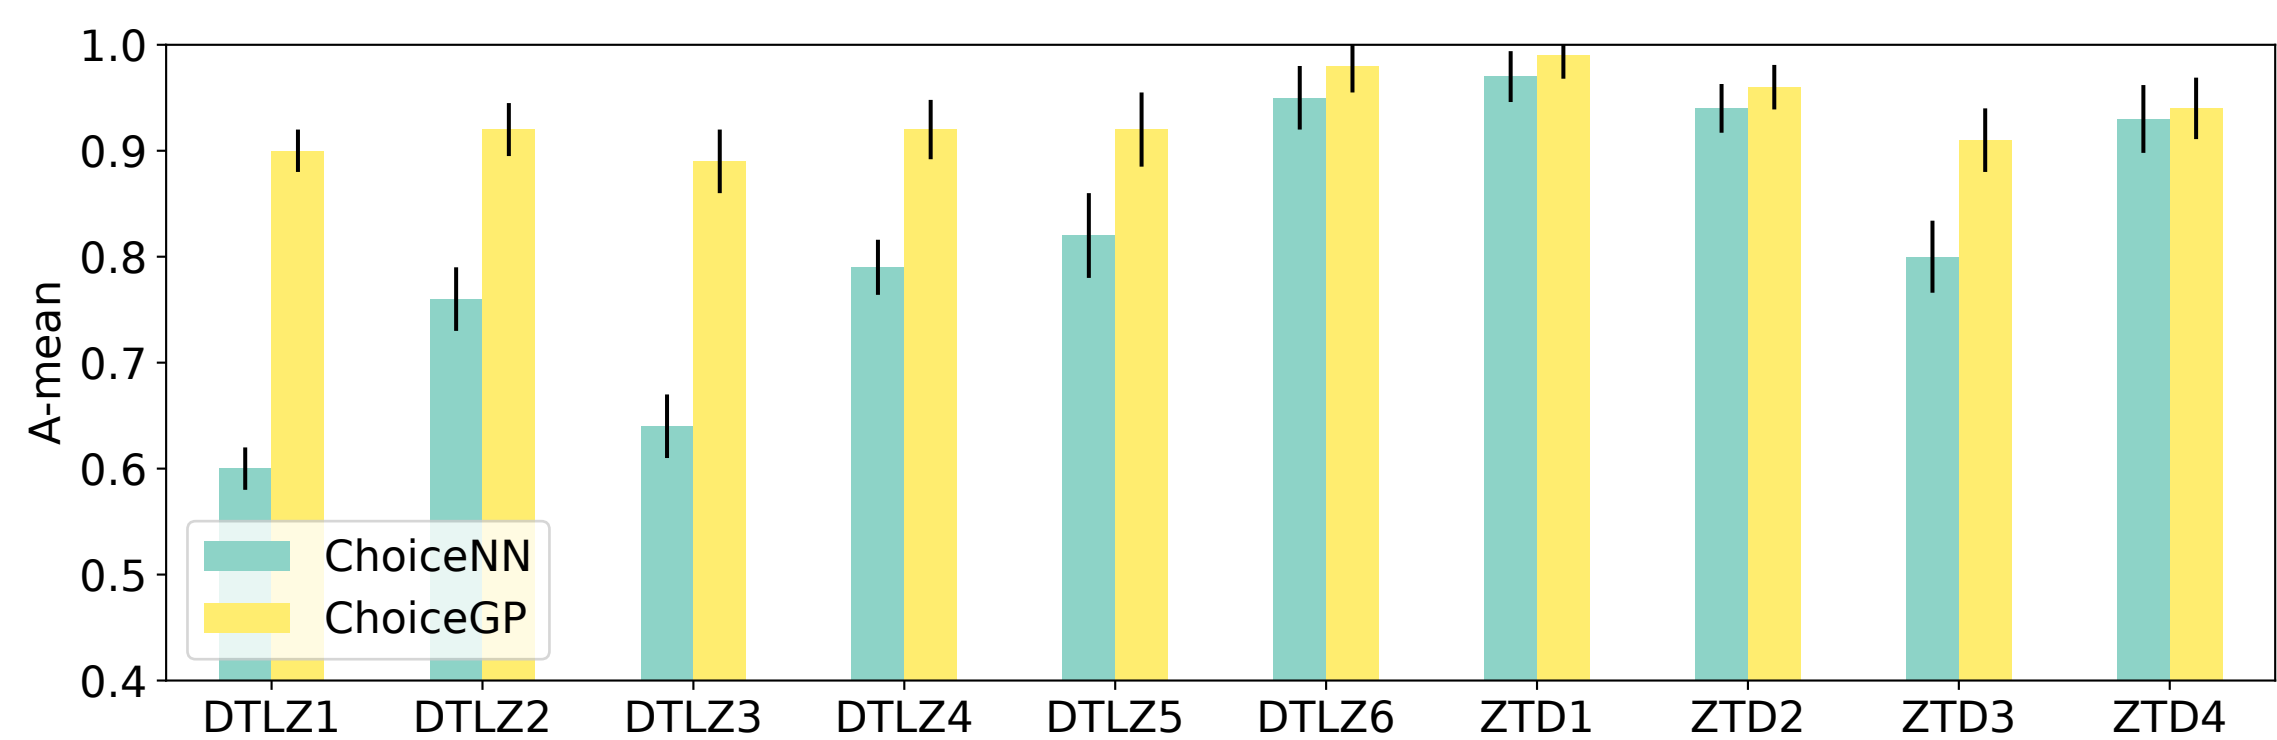

Supplement: supplementary_material [file attachment]

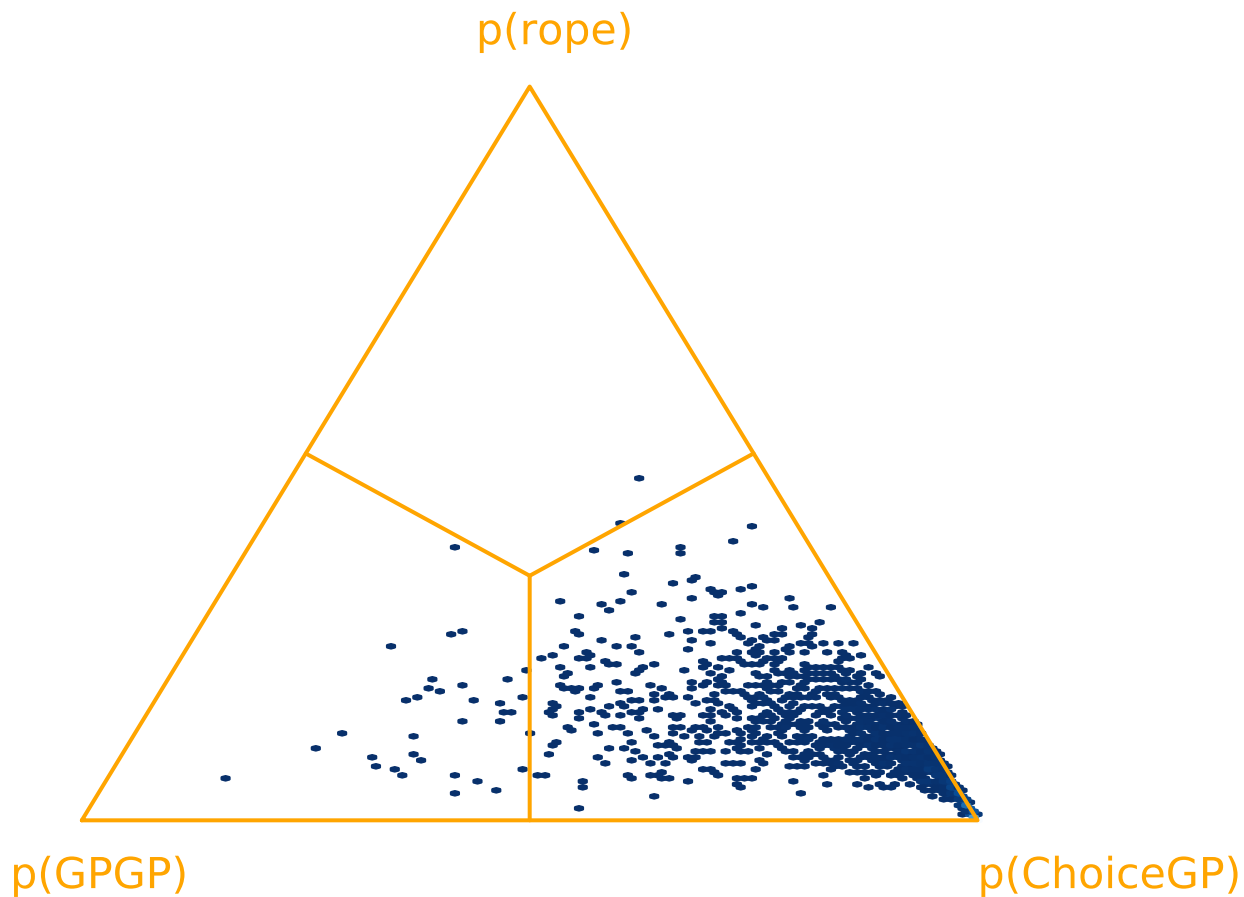

Supplement: supplementary_material [file attachment]

True utility

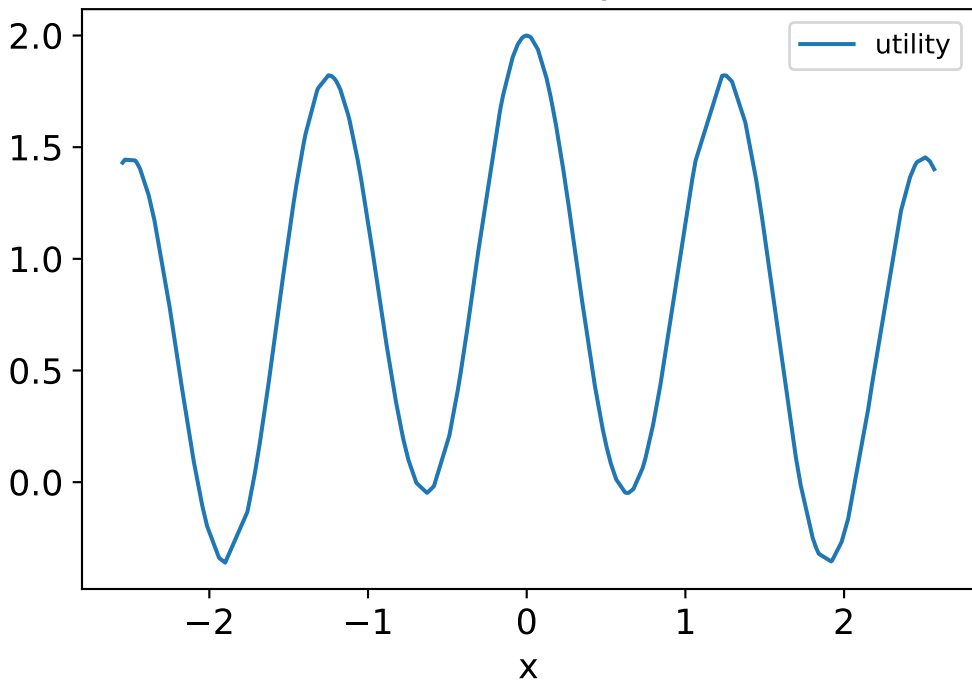

Supplement: supplementary_material [file attachment]

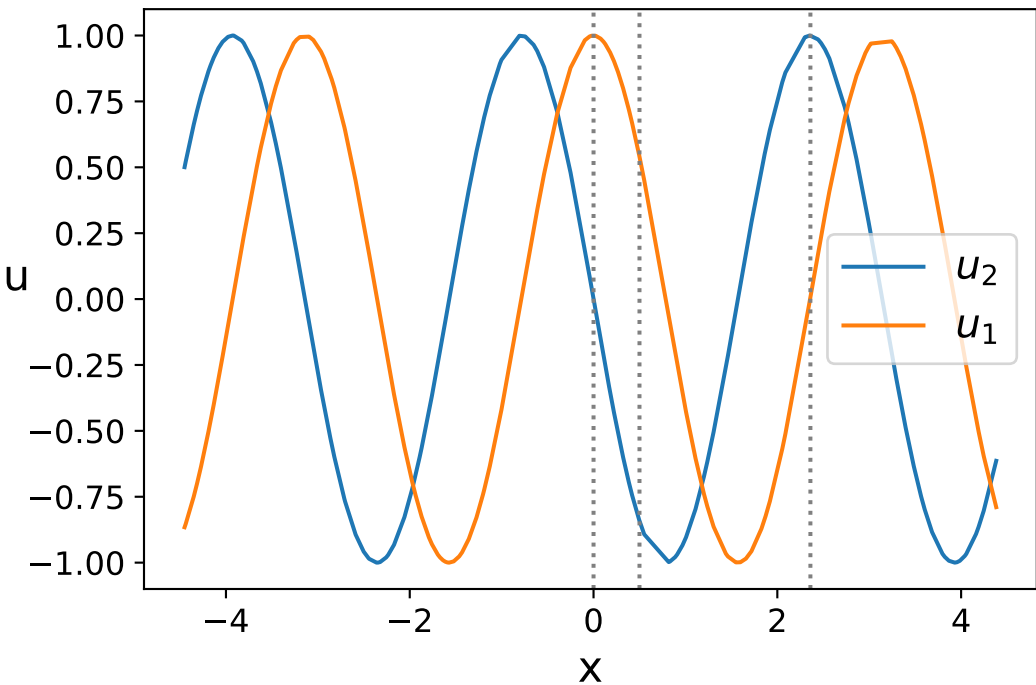

Supplement: supplementary_material [file attachment]

ChoiceNN d=2

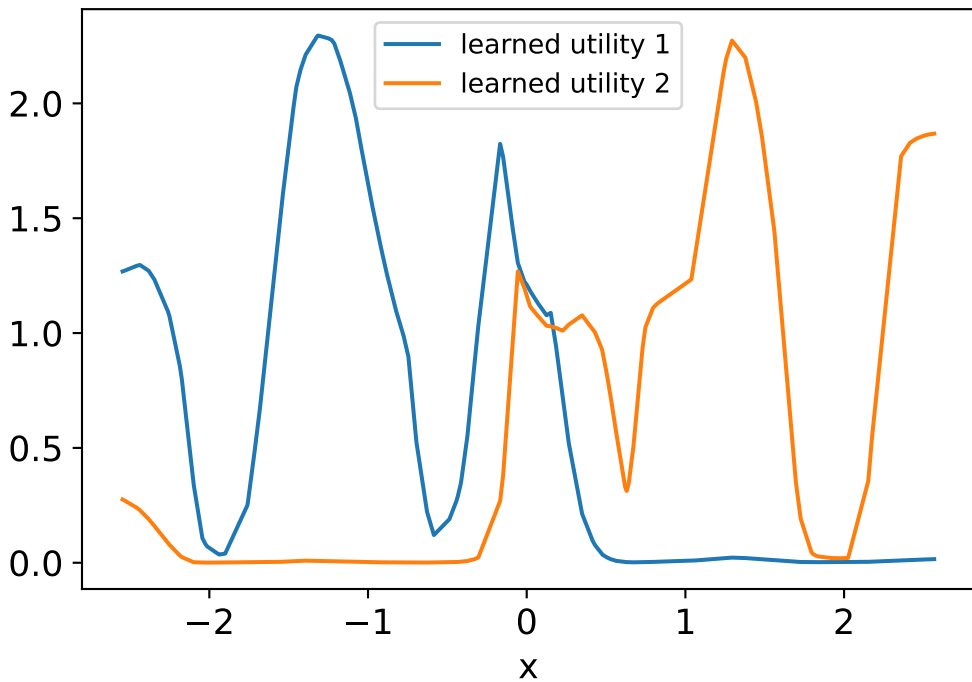

Supplement: supplementary_material [file attachment]

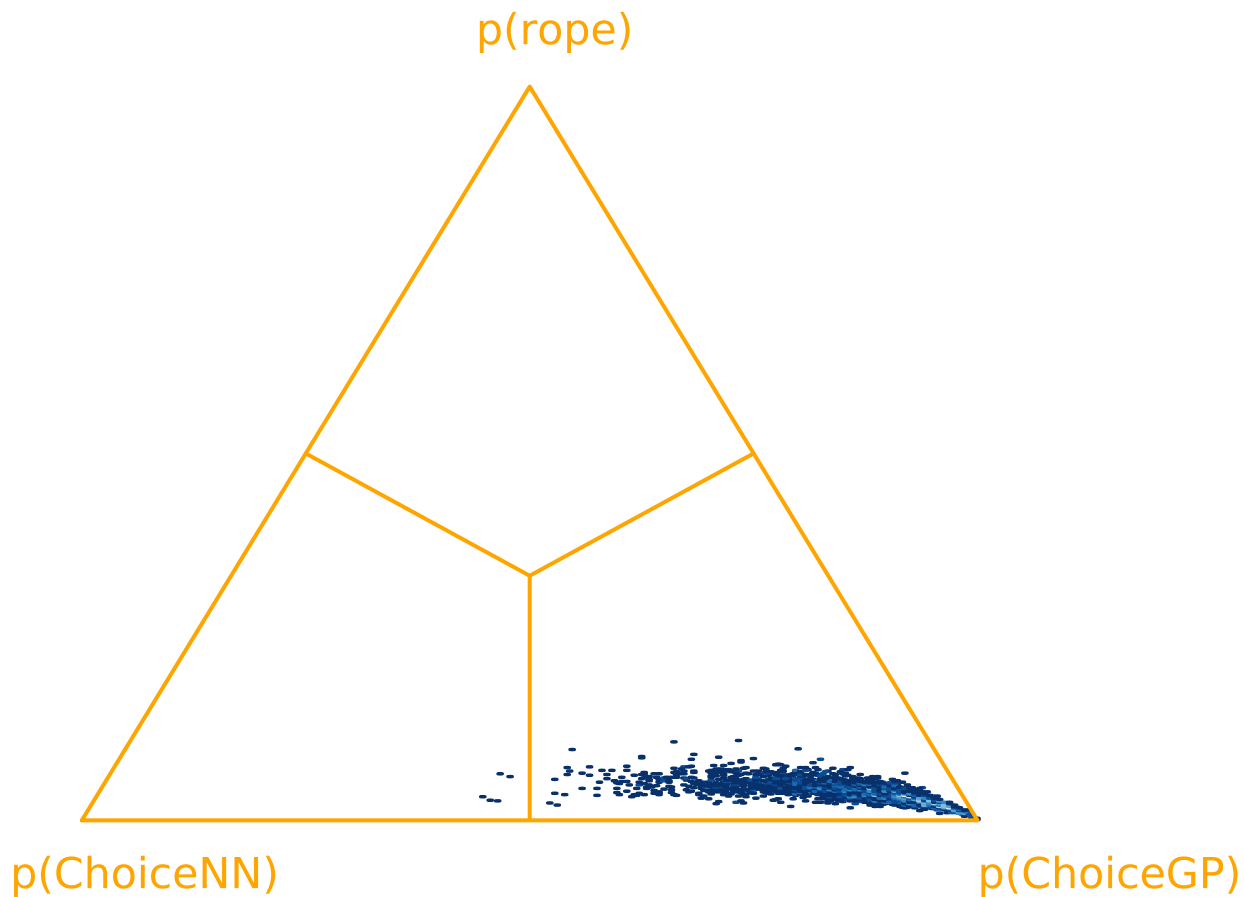

Supplement: supplementary_material [file attachment]

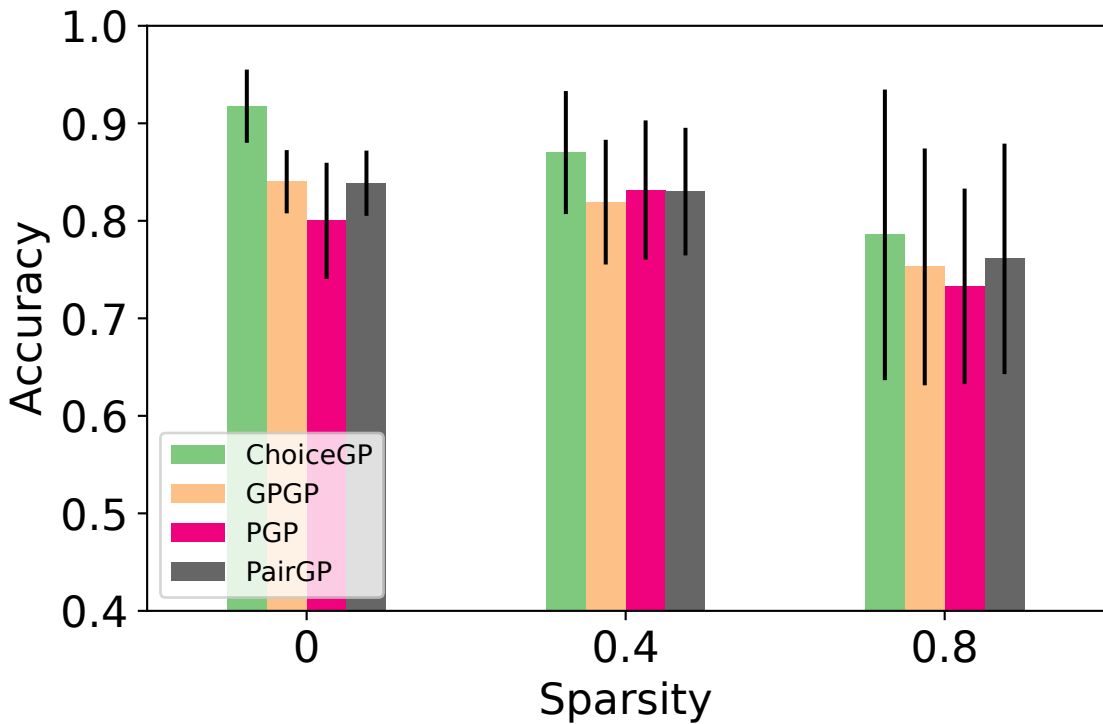

Supplement: supplementary_material [file attachment]

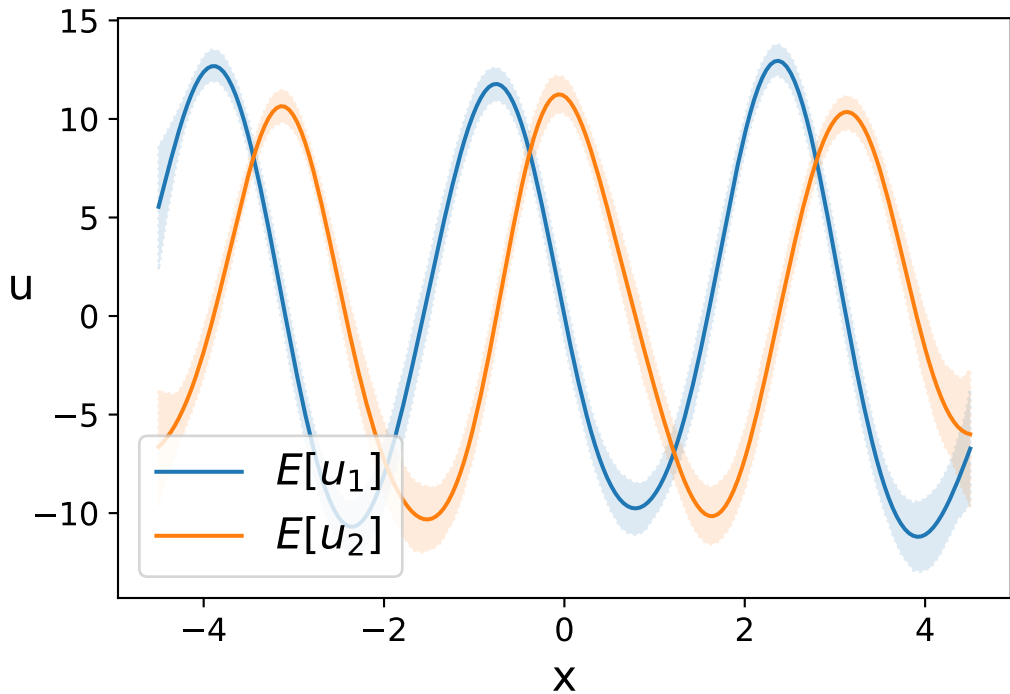

Supplement: supplementary_material [file attachment]

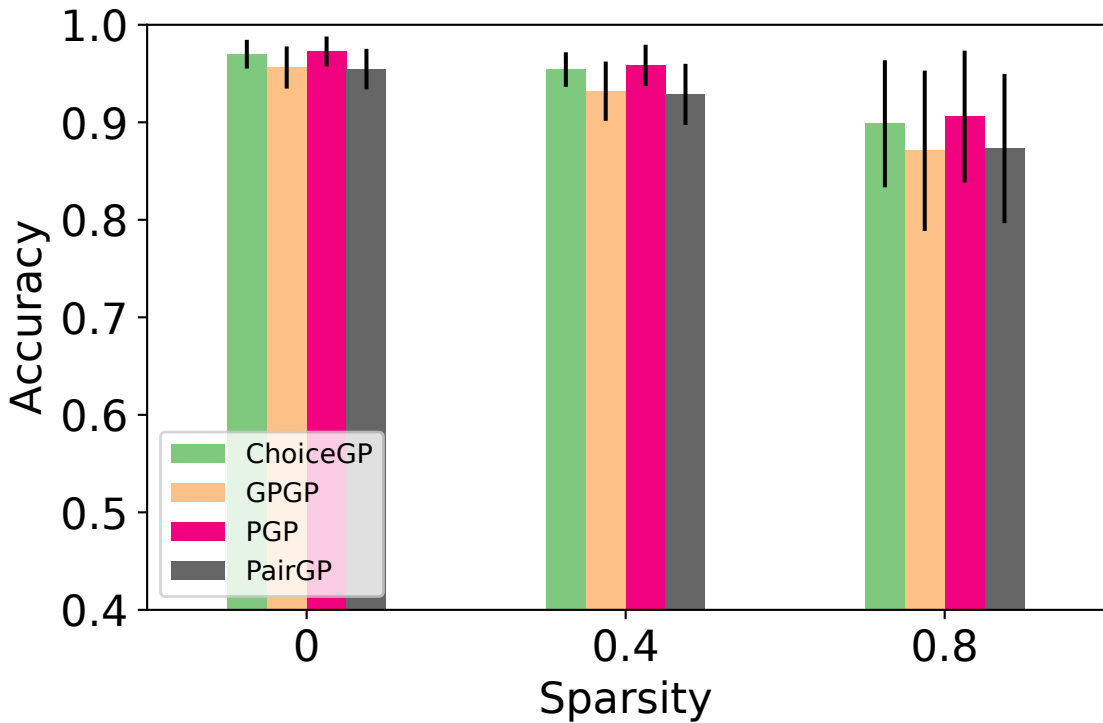

Supplement: supplementary_material [file attachment]

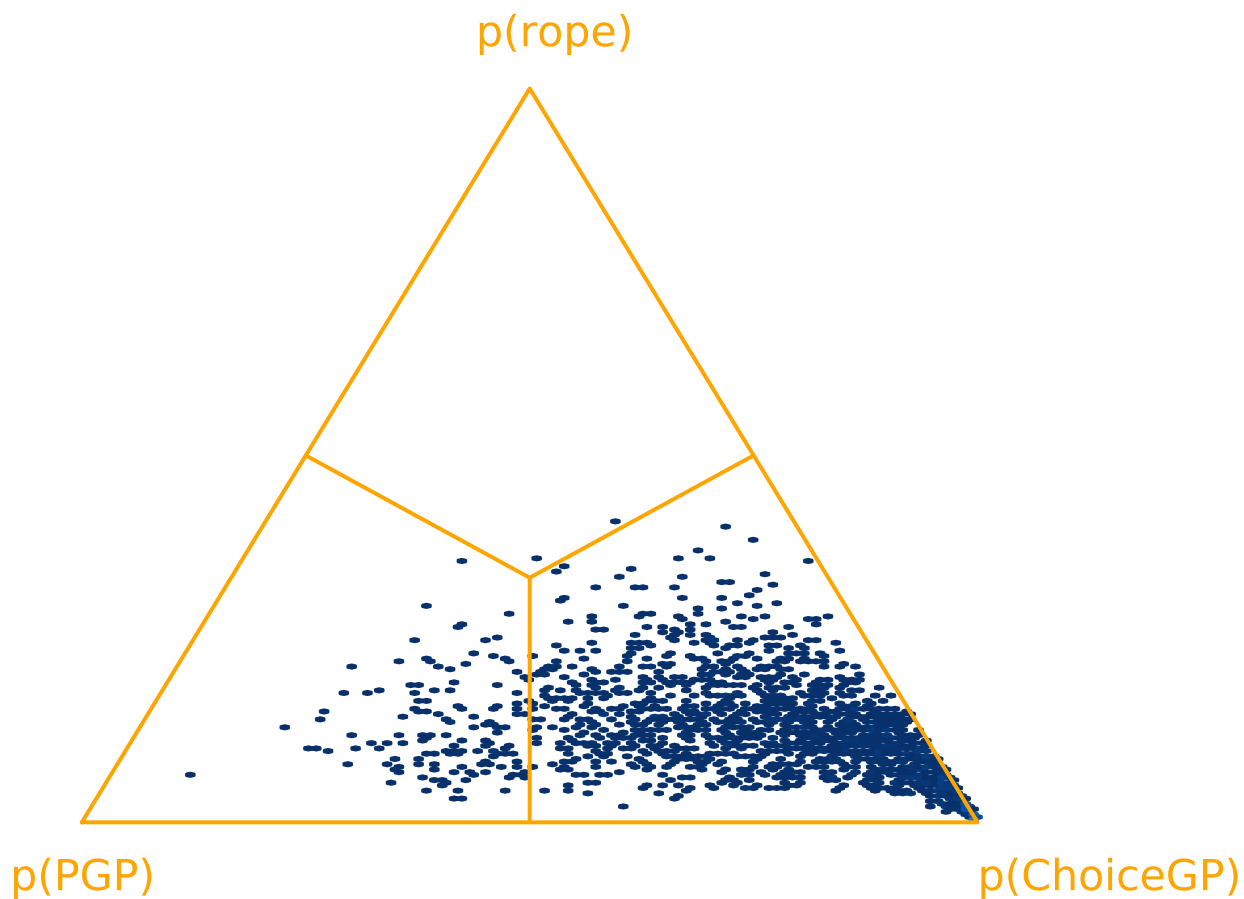

Supplement: supplementary_material [file attachment]

ChoiceGP dim=2

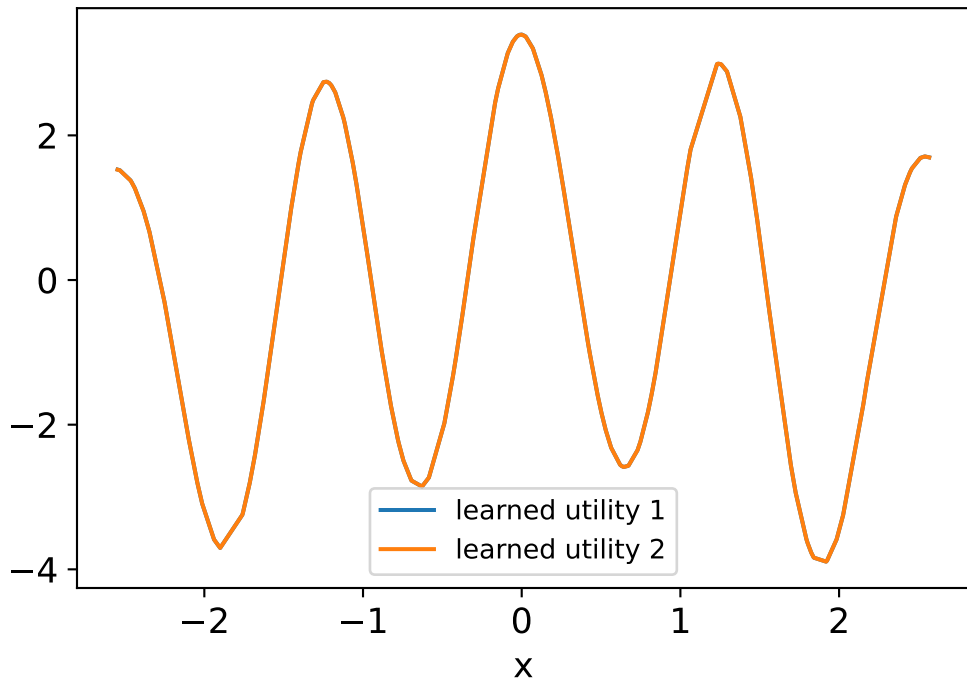

Supplement: supplementary_material [file attachment]

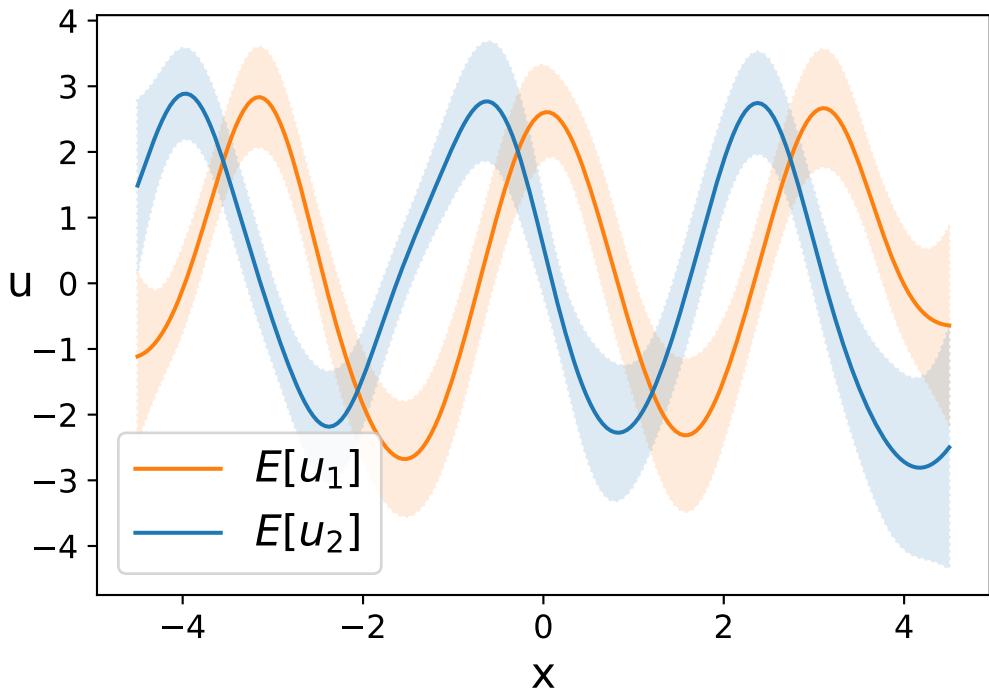

Supplement: supplementary_material [file attachment]

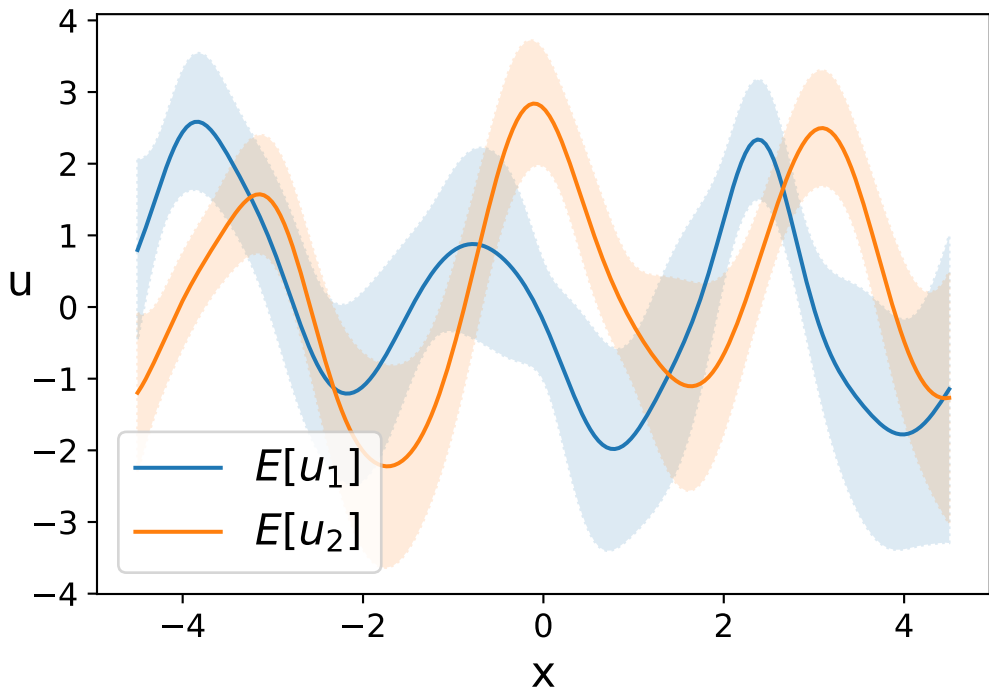

Supplement: supplementary_material [file attachment]

ChoiceNN d=2

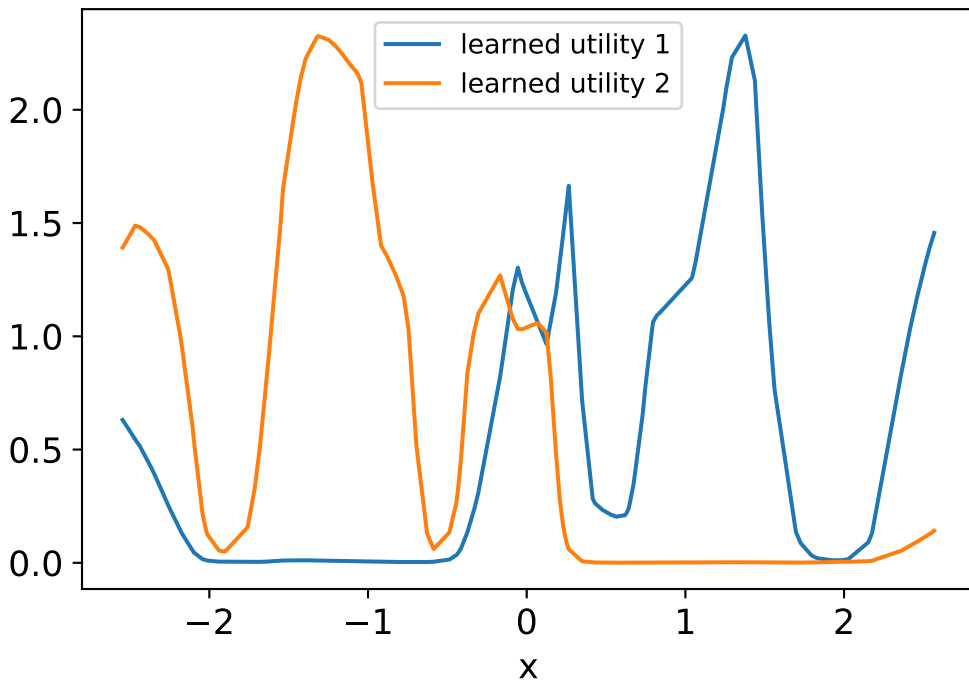

Supplement: supplementary_material [file attachment]

ChoiceNN d=1

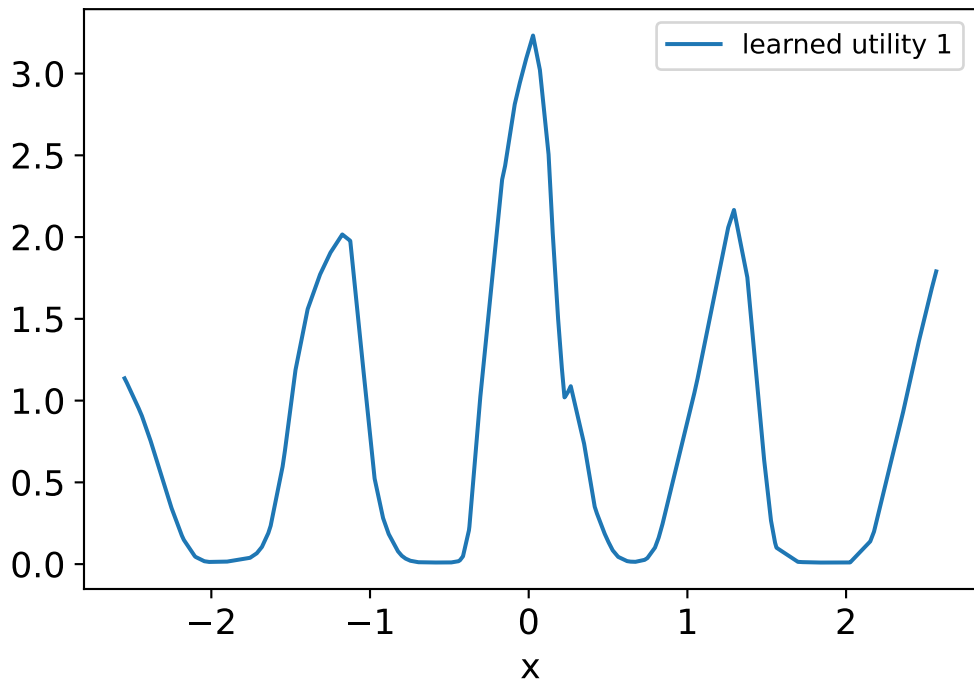

Supplement: supplementary_material [file attachment]

Sparsity=0.4

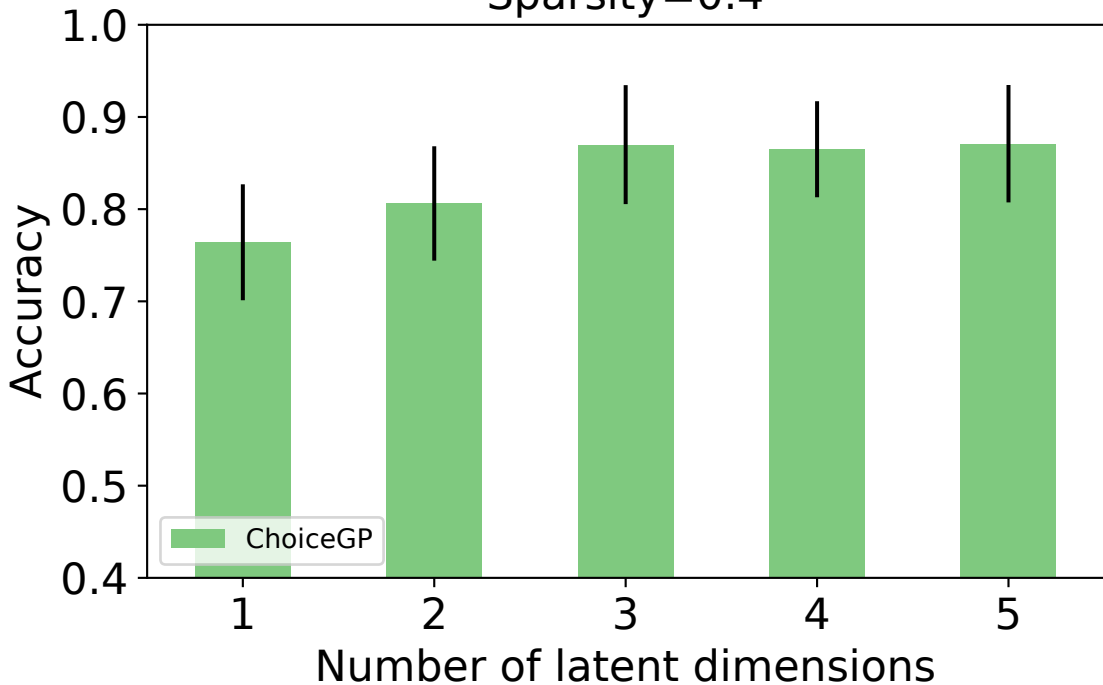

Supplement: supplementary_material [file attachment]
